# Supplementary material
Source: publisher figshare collection journal article supplement (https://karger.figshare.com/ndownloader/files/13850831)
Supplement: Supplementary file 1 [file 13850831]

## Supplementary Material

# **lncRNA MEG3 Suppresses the Tumorigenesis of Hemangioma by Sponging miR-494 and Regulating PTEN/PI3K/AKT Pathway**

Yuxin Dai<sup>a</sup> Yongkun Wan<sup>b</sup> Mingke Qiu<sup>a</sup> Shuqing Wang<sup>a</sup> Chang Pan<sup>a</sup> Yang Wang<sup>a</sup>  
Jingmin Ou<sup>a</sup>

<sup>a</sup>Department of General Surgery, Xinhua Hospital, Shanghai Jiao Tong University, School of Medicine, Shanghai,

<sup>b</sup>Department of Gastrointestinal Surgery, The First Affiliated Hospital of Bengbu Medical College, Bengbu, China

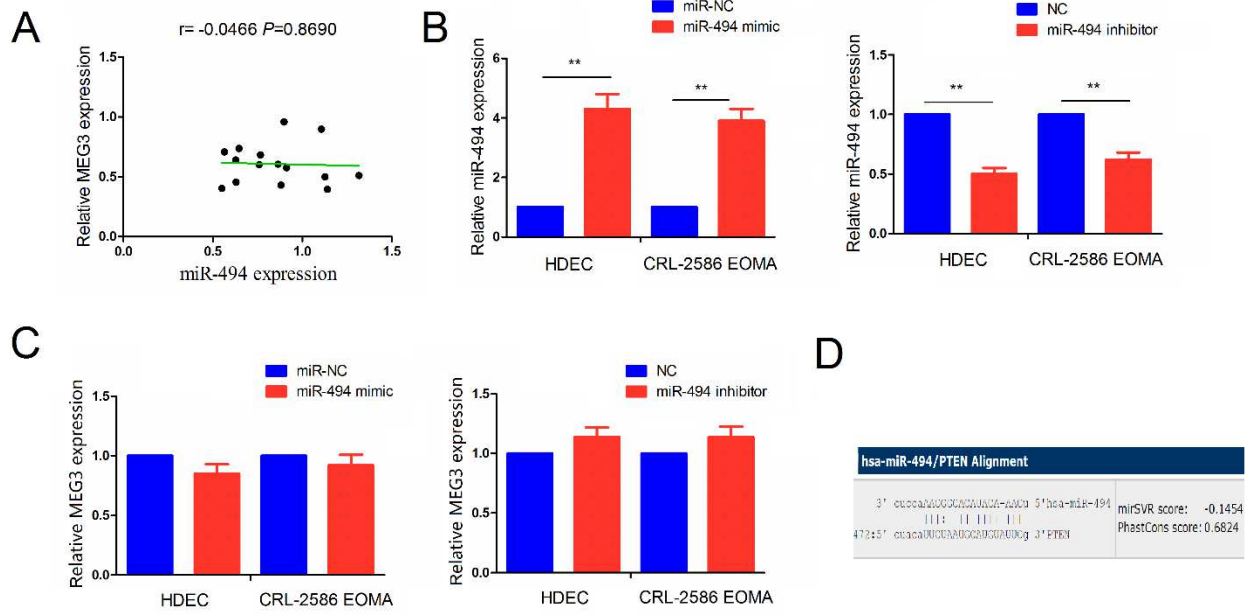

Supplementary Fig. 1

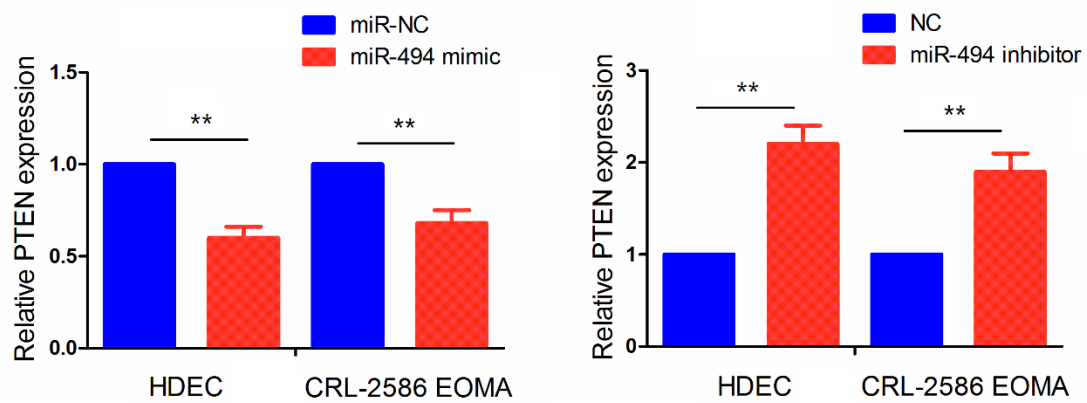

Supplementary Fig. 2

Supplementary Fig. 1 The correlation of miR-494 with MEG3 or PTEN in HAs samples. (A) Spearman correlation analysis of the correlation of lncRNA MEG3 with miR-494 expression in involuting phase HAs. (B, C) qRT-PCR analysis of the expression levels of miR-494 and lncRNA MEG3 after transfection with miR-494 mimic or inhibitor in HDEC and CRL-2586 EOMA cells. (D) Schematic representation of the binding sites of wt or Mut 3'UTR of PTEN with miR-494. Data are the means  $\pm$  SEM of three experiments. \*\*P<0.01.

Supplementary Fig. 2 The effects of miR-494 mimic or inhibitor on the mRNA expression of PTEN in HAs cells indicated by qRT-PCR analysis.

Table S1 Identification of miRNAs sponged by lncRNA MEG3

| No. | miRNAs         | mirSVR score | PhastCons score |
|-----|----------------|--------------|-----------------|
| 1   | hsa-miR-494    | -0.2893      | 0.5835          |
| 2   | hsa-let-7b     | -0.1899      | 0.5835          |
| 3   | hsa-let-7f     | -0.1899      | 0.5835          |
| 4   | hsa-let-7g     | -0.1899      | 0.5835          |
| 5   | hsa-let-7i     | -0.1899      | 0.5835          |
| 6   | hsa-let-7a     | -0.1882      | 0.5835          |
| 7   | hsa-let-7c     | -0.1882      | 0.5835          |
| 8   | hsa-let-7e     | -0.1882      | 0.5835          |
| 9   | hsa-miR-98     | -0.1882      | 0.5835          |
| 10  | hsa-let-7d     | -0.1864      | 0.5835          |
| 11  | hsa-miR-499-5p | -0.1178      | 0.5835          |
| 12  | hsa-miR-208b   | 0.1155       | 0.5835          |
| 13  | hsa-miR-208a   | -0.1143      | 0.5835          |
| 14  | hsa-miR-421    | -0.1109      | 0.5677          |
